# Supplementary material for: CD163 and pAPN double-knockout pigs are resistant to PRRSV and TGEV and exhibit decreased susceptibility to PDCoV while maintaining normal production performance
Source: eLife. 2020 Sep 2;9:e57132. doi: 10.7554/eLife.57132 (PMC7467724; doi:10.7554/eLife.57132)
Supplement: Figure 2—source data 1. [file elife-57132-fig2-data1.xlsx]

## Sheet: Sheet1
Figure 2-Source data 1. The qRT-PCR detection of PRRSV load in PAMs.
Time post infection	Log10 (PRRSV RNA copies)
	WT			DKO			WT		DKO
	repeat 1	repeat 2	repeat 3	repeat 1	repeat 2	repeat 3	Average	Standard Deviation	Average	Standard Deviation
12 h	6.40476	6.34813	6.38963	5.08255	5.09167	5.06619	6.38084	0.0239407	5.08014	0.0105413
36 h	7.38968	7.46856	7.48655	0	0	0	7.44826	0.042073	0	0
60 h	7.34396	7.34777	7.33446	0	0	0	7.34206	0.00559832	0	0
