# Supplementary material for: CD163 and pAPN double-knockout pigs are resistant to PRRSV and TGEV and exhibit decreased susceptibility to PDCoV while maintaining normal production performance
Source: eLife. 2020 Sep 2;9:e57132. doi: 10.7554/eLife.57132 (PMC7467724; doi:10.7554/eLife.57132)
Supplement: Figure 2—source data 2. [file elife-57132-fig2-data2.xlsx]

## Sheet: Sheet1
Figure 2-Source data 2. Rectal temperatures of pigs.
Days post infection	WT						DKO				WT		DKO
	Pig 1	Pig 2	Pig 3	Pig 4	Pig 5	Pig 6	Pig 1	Pig 2	Pig 3	Pig 4	Average	Standard Deviation	Average	Standard Deviation
0	39.8	39.8	39.6	39.5	39.8	40.5	39.7	39.6	39.6	39.5	39.8333	0.319722	39.6	0.0707107
1	41.8	41.9	42.2	41.2	41.3	41.9	39.5	39.4	39.4	39.5	41.7167	0.35316	39.45	0.05
2	40.2	40.8	40.4	41.2	40.7	41.2	39.5	39.4	39.4	39.3	40.75	0.37305	39.4	0.0707107
3	40.8	40.2	40.9	41.3	40.6	41.2	39.4	39.5	39.4	39.5	40.8333	0.368179	39.45	0.05
4	40.8	41.2	41.6	39.5	40.8	41.5	39.4	39.3	39.3	39.4	40.9	0.697615	39.35	0.05
5	41.7	41.3	42.3	--	41.8	41.9	39.3	39.3	39.4	39.2	41.8	0.32249	39.3	0.0707107
6	41.4	41.1	41.6	--	41.9	41.7	39.2	39.1	39.3	39.4	41.54	0.272764	39.25	0.111803
7	41.1	40.8	41.2	--	41.1	41.5	39.4	39.1	39.2	39.3	41.14	0.224499	39.25	0.111803
8	41.1	40.9	41.2	--	41.7	41.4	39.5	39.2	39.4	39.3	41.26	0.272764	39.35	0.111803
9	41.2	39.5	--	--	40.2	41.9	39.2	39.3	39.2	39.2	40.7	0.919239	39.225	0.0433013
10	41.6	--	--	--	--	41.9	39.3	39.5	39.4	39.1	41.75	0.15	39.325	0.147902
11	41.3	--	--	--	--	--	39.3	39.2	39.3	39.2	41.3	0	39.25	0.05
12	--	--	--	--	--	--	39.2	39.3	39.2	39.3	--	--	39.25	0.05
13	--	--	--	--	--	--	39.3	39.2	39.4	39.3	--	--	39.3	0.0707107
14	--	--	--	--	--	--	39.3	39.2	39.3	39.3	--	--	39.275	0.0433013
--: died
