# Supplementary material for: CD163 and pAPN double-knockout pigs are resistant to PRRSV and TGEV and exhibit decreased susceptibility to PDCoV while maintaining normal production performance
Source: eLife. 2020 Sep 2;9:e57132. doi: 10.7554/eLife.57132 (PMC7467724; doi:10.7554/eLife.57132)
Supplement: Figure 2—source data 3. [file elife-57132-fig2-data3.xlsx]

## Sheet: Sheet1
Figure 2-Source data 3. Clinical symptoms scores of pigs.
Days post infection	WT						DKO				WT		DKO
	Pig 1	Pig 2	Pig 3	Pig 4	Pig 5	Pig 6	Pig 1	Pig 2	Pig 3	Pig 4	Average	Standard Deviation	Average	Standard Deviation
0	0	0	0	0	0	0	0	0	0	0	0	0	0	0
1	4	6	4	6	6	6	0	0	0	0	5.33333	0.942809	0	0
2	4	6	4	6	6	6	0	0	0	0	5.33333	0.942809	0	0
3	6	7	6	6	6	8	0	0	0	0	6.5	0.763763	0	0
4	5	7	6	8	5	7	0	1	0	0	6.33333	1.10554	0.25	0.433013
5	6	9	9	6	--	9	0	0	0	0	7.8	1.46969	0	0
6	6	9	9	7	--	6	0	0	0	0	7.4	1.35647	0	0
7	7	9	9	6	--	6	0	0	0	0	7.4	1.35647	0	0
8	8	9	9	9	--	8	0	0	0	0	8.6	0.489898	0	0
9	9	9	9	--	--	9	0	0	1	0	9	0	0.25	0.433013
10	9	--	--	--	--	9	0	0	0	0	9	0	0	0
11	9	--	--	--	--	--	0	0	0	0	9	0	0	0
12	--	--	--	--	--	--	0	0	0	0	--	--	0	0
13	--	--	--	--	--	--	0	0	0	0	--	--	0	0
14	--	--	--	--	--	--	0	0	0	0	--	--	0	0
--: died
