# Supplementary material for: CD163 and pAPN double-knockout pigs are resistant to PRRSV and TGEV and exhibit decreased susceptibility to PDCoV while maintaining normal production performance
Source: eLife. 2020 Sep 2;9:e57132. doi: 10.7554/eLife.57132 (PMC7467724; doi:10.7554/eLife.57132)
Supplement: Figure 2—source data 4. [file elife-57132-fig2-data4.xlsx]

## Sheet: Sheet1
Figure 2-Source data 4. Body weights of pigs.
Days post infection	WT						DKO				WT		DKO
	Pig 1	Pig 2	Pig 3	Pig 4	Pig 5	Pig 6	Pig 1	Pig 2	Pig 3	Pig 4	Average	Standard Deviation	Average	Standard Deviation
0	8.05	7.69	6.3	7.13	8.2	7.7	7.7	7.6	8.1	5.5	7.51167	0.638316	7.225	1.01335
3	7.1	7.9	6.2	6.9	7.8	8	9	8.2	9	6.8	7.31667	0.646572	8.25	0.89861
7	8.27	7.13	5.86	--	7.43	8.48	9.6	9	9.6	6.9	7.434	0.934122	8.775	1.1099
10	7.9	--	--	--	--	7.98	10.3	9.4	10.3	7.8	7.94	0.04	9.45	1.02103
14	--	--	--	--	--	--	12.6	11.5	12.4	10	--	--	11.625	1.02561
--: died
