# Supplementary material for: CD163 and pAPN double-knockout pigs are resistant to PRRSV and TGEV and exhibit decreased susceptibility to PDCoV while maintaining normal production performance
Source: eLife. 2020 Sep 2;9:e57132. doi: 10.7554/eLife.57132 (PMC7467724; doi:10.7554/eLife.57132)
Supplement: Figure 2—source data 5. [file elife-57132-fig2-data5.xlsx]

## Sheet: Sheet1
Figure 2-Source data 5. The survival rate of pigs.
Days post infection	Number of survival pigs		Survival rate of pigs (%)
	WT	DKO	WT	DKO
0	5	4	100	100
1	5	4	100	100
2	5	4	100	100
3	5	4	100	100
4	4	4	80	100
5	4	4	80	100
6	4	4	80	100
7	4	4	80	100
8	4	4	80	100
9	1	4	20	100
10	1	4	20	100
11	0	4	0	100
12	0	4	0	100
13	0	4	0	100
14	0	4	0	100
