# Supplementary material for: CD163 and pAPN double-knockout pigs are resistant to PRRSV and TGEV and exhibit decreased susceptibility to PDCoV while maintaining normal production performance
Source: eLife. 2020 Sep 2;9:e57132. doi: 10.7554/eLife.57132 (PMC7467724; doi:10.7554/eLife.57132)
Supplement: Figure 2—source data 6. [file elife-57132-fig2-data6.xlsx]

## Sheet: Sheet1
Figure 2-Source data 6. The qRT-PCR detection of PRRSV load in serum.
Days post infection	Log10 (PRRSV RNA copies)
	WT						DKO				WT		DKO
	Pig 1	Pig 2	Pig 3	Pig 4	Pig 5	Pig 6	Pig 1	Pig 2	Pig 3	Pig 4	Average	Standard Deviation	Average	Standard Deviation
0	0	0	0	0	0	0	0	0	0	0	0	0	0	0
3	8.09849	8.92014	8.54474	8.09849	8.5539	7.20878	0	0	0	0	8.23742	0.541206	0	0
7	9.28381	8.28617	9.65617	10.0348	9.36723	--	0	0	0	0	9.32563	0.582424	0	0
10	8.25664	8.35677	--	--	--	--	0	0	0	0	8.30671	0.0500655	0	0
14	--	--	--	--	--	--	0	0	0	0	--	--	0	0
