# Supplementary material for: CD163 and pAPN double-knockout pigs are resistant to PRRSV and TGEV and exhibit decreased susceptibility to PDCoV while maintaining normal production performance
Source: eLife. 2020 Sep 2;9:e57132. doi: 10.7554/eLife.57132 (PMC7467724; doi:10.7554/eLife.57132)
Supplement: Figure 2—source data 7. [file elife-57132-fig2-data7.xlsx]

## Sheet: Sheet1
Figure 2-Source data 7. The qRT-PCR detection of PRRSV load in PAMs, lung tissues and tonsil tissues.
Sample Type	Log10 (PRRSV RNA copies)
	WT					DKO				WT		DKO
	repeat 1	repeat 2	repeat 3	repeat 4	repeat 5	repeat 1	repeat 2	repeat 3	repeat 4	Average	Standard Deviation	Average	Standard Deviation
PAMs	7.86364	7.79362	7.78341	--	--	2.51101	2.48976	3.15612	--	7.81356	0.0356575	2.71896	0.309239
Lung tissues	7.23455	7.49141	7.9158	7.2479	7.41851	3.28064	3.0757	3.10736	--	7.46164	0.247494	3.15457	0.0900809
Tonsil tissues	4.37987	5.22697	6.32386	5.46368	5.06267	3.12004	3.10275	3.16256	2.61164	5.29141	0.629764	2.99924	0.224842
