# Supplementary material for: CD163 and pAPN double-knockout pigs are resistant to PRRSV and TGEV and exhibit decreased susceptibility to PDCoV while maintaining normal production performance
Source: eLife. 2020 Sep 2;9:e57132. doi: 10.7554/eLife.57132 (PMC7467724; doi:10.7554/eLife.57132)
Supplement: Figure 2—source data 8. [file elife-57132-fig2-data8.xlsx]

## Sheet: Sheet1
Figure 2-Source data 8. PRRSV-specific antibodies in serum (S/P ration).
Days post infection	WT						DKO				WT		DKO
	Pig 1	Pig 2	Pig 3	Pig 4	Pig 5	Pig 6	Pig 1	Pig 2	Pig 3	Pig 4	Average	Standard Deviation	Average	Standard Deviation
0	0.015	0.011	0.023	0.013	0.014	0.029	0.111	0.139	0.183	0.005	0.0175	0.0063705	0.1095	0.0655649
3	0.006	0.005	0.001	0.001	0.014	0.01	0.09	0.106	0.214	0.019	0.00616667	0.00466964	0.10725	0.0697903
7	0.813	0.769	0.645	--	0.523	0.765	0.087	0.067	0.13	0.008	0.703	0.105891	0.073	0.0438919
10	1.192	--	--	--	--	1.299	0.079	0.069	0.154	0.006	1.2455	0.0535	0.077	0.0525309
14	--	--	--	--	--	--	0.033	0.025	0.215	0.011	--	--	0.071	0.0835105
--: died
