# Supplementary material for: CD163 and pAPN double-knockout pigs are resistant to PRRSV and TGEV and exhibit decreased susceptibility to PDCoV while maintaining normal production performance
Source: eLife. 2020 Sep 2;9:e57132. doi: 10.7554/eLife.57132 (PMC7467724; doi:10.7554/eLife.57132)
Supplement: Figure 3—source data 1. [file elife-57132-fig3-data1.xlsx]

## Sheet: Sheet1
Figure 3-Source data 1. TGEV-specific neutralization antibody in serum.
Days post infection	Antibody titer (Log2)
	WT					DKO				WT		DKO
	Pig 1	Pig 2	Pig 3	Pig 4	Pig 5	Pig 1	Pig 2	Pig 3	Pig 4	Average	Standard Deviation	Average	Standard Deviation
0	0	0	0	0	0	0	0	0	0	0	0	0	0
7	0	0	0	3.32	3.49	0	0	0	0	1.362	1.66897	0	0
14	3.82	4	2.49	5.35	5.5	0	0	0	0	4.232	1.10597	0	0
