# Supplementary material for: CD163 and pAPN double-knockout pigs are resistant to PRRSV and TGEV and exhibit decreased susceptibility to PDCoV while maintaining normal production performance
Source: eLife. 2020 Sep 2;9:e57132. doi: 10.7554/eLife.57132 (PMC7467724; doi:10.7554/eLife.57132)
Supplement: Figure 4—figure supplement 1—source data 1. [file elife-57132-fig4-figsupp1-data1.xlsx]

## Sheet: Sheet1
Figure 4-figure supplement 1-Source data 1. The TCID50 detection of PDCoV titer in PAMs.
Time post infection	Log10 (PDCoV TCID50/mL)
	WT			DKO			Mean ± SEM of WT		Mean ± SEM of DKO		p Value
	repeat 1	repeat 2	repeat 3	repeat 1	repeat 2	repeat 3	4.711 ± 0.04433 N=3		4.100 ± 0.1000 N=3		0.005
24 h	4.8	4.667	4.667	4.2	3.9	4.2
