# Supplementary material for: CD163 and pAPN double-knockout pigs are resistant to PRRSV and TGEV and exhibit decreased susceptibility to PDCoV while maintaining normal production performance
Source: eLife. 2020 Sep 2;9:e57132. doi: 10.7554/eLife.57132 (PMC7467724; doi:10.7554/eLife.57132)
Supplement: Figure 4—figure supplement 1—source data 2. [file elife-57132-fig4-figsupp1-data2.xlsx]

## Sheet: Sheet1
Figure 4-figure supplement 1-Source data 2. The qRT-PCR detection of PDCoV RNA copies in PAMs.
Time post infection	PDCoV RNA copies (105)
	WT			DKO			Mean ± SEM of WT		Mean ± SEM of DKO		p Value
	repeat 1	repeat 2	repeat 3	repeat 1	repeat 2	repeat 3	2.046 ± 0.009252 N=3		1.264 ± 0.01489 N=3		＜ 0.0001
24 h	2.02953	2.04806	2.06145	1.26659	1.23744	1.28886
