# Supplementary material for: CD163 and pAPN double-knockout pigs are resistant to PRRSV and TGEV and exhibit decreased susceptibility to PDCoV while maintaining normal production performance
Source: eLife. 2020 Sep 2;9:e57132. doi: 10.7554/eLife.57132 (PMC7467724; doi:10.7554/eLife.57132)
Supplement: Figure 4—figure supplement 1—source data 3. [file elife-57132-fig4-figsupp1-data3.xlsx]

## Sheet: Sheet1
Figure 4-figure supplement 1-Source data 3. The western blot detection of the relative PDCoV-N protein level in PAMs.
Time post infection	Relative PDCoV-N protein level (%)
	WT				DKO				Mean ± SEM of WT		Mean ± SEM of DKO		p Value
	repeat 1	repeat 2	repeat 3	repeat 4	repeat 1	repeat 2	repeat 3	repeat 4	100.0 ± 0.0 N=4		51.95 ± 2.739 N=4		＜ 0.0001
24 h	100	100	100	100	54.3757	45.5087	49.8099	58.1206
