# Supplementary material for: CD163 and pAPN double-knockout pigs are resistant to PRRSV and TGEV and exhibit decreased susceptibility to PDCoV while maintaining normal production performance
Source: eLife. 2020 Sep 2;9:e57132. doi: 10.7554/eLife.57132 (PMC7467724; doi:10.7554/eLife.57132)
Supplement: Figure 4—source data 1. [file elife-57132-fig4-data1.xlsx]

## Sheet: Sheet1
Figure 4-Source data 1. PDCoV-specific neutralization antibody in serum.
Days post infection	Antibody titer (Log2)
	WT				DKO		WT		DKO
	Pig 1	Pig 2	Pig 3	Pig 4	Pig 1	Pig 2	Average	Standard Deviation	Average	Standard Deviation
0	0	0	0	0	0	0	0	0	0	0
7	2.49	3.49	2	ND	0	0	2.66	0.620054	0	0
14	2.49	2.36	3	3.65	2.76	2.76	2.875	0.507371	2.76	0
ND：not done
