# Supplementary material for: CD163 and pAPN double-knockout pigs are resistant to PRRSV and TGEV and exhibit decreased susceptibility to PDCoV while maintaining normal production performance
Source: eLife. 2020 Sep 2;9:e57132. doi: 10.7554/eLife.57132 (PMC7467724; doi:10.7554/eLife.57132)
Supplement: Figure 4—source data 2. [file elife-57132-fig4-data2.xlsx]

## Sheet: Sheet1
Figure 4-Source data 2. The ratio of intestinal villus height to the crypt depth in PDCoV group.
Intestinal Type	Mock			WT			DKO			Mock		WT		DKO
	repeat 1	repeat 2	repeat 3	repeat 1	repeat 2	repeat 3	repeat 1	repeat 2	repeat 3	Average	Standard Deviation	Average	Standard Deviation	Average	Standard Deviation
Duodenum	1.176	1.53982	1.88889	0.841917	0.826926	0.645389	0.717577	0.873058	0.781091	1.5349	0.291056	0.771411	0.0893207	0.790575	0.0638282
Jejunum	1.69811	2.3913	1.9	1.55293	1.35135	1.61539	1.34038	1.82979	1.20567	1.99647	0.2911	1.50656	0.11267	1.45861	0.268159
Iluem	1.35714	1.22162	1.58427	0.688075	0.763714	0.879471	0.823742	1.34305	1.06521	1.38768	0.149617	0.777087	0.0787072	1.07734	0.212181
