# Supplementary material for: CD163 and pAPN double-knockout pigs are resistant to PRRSV and TGEV and exhibit decreased susceptibility to PDCoV while maintaining normal production performance
Source: eLife. 2020 Sep 2;9:e57132. doi: 10.7554/eLife.57132 (PMC7467724; doi:10.7554/eLife.57132)
Supplement: Figure 5—source data 1. [file elife-57132-fig5-data1.xlsx]

## Sheet: Sheet1
Figure 5-source data 1. Meat color scores for WT and DKO pigs
	WT pigs				DKO pigs
Item	A1#	A2#	A3#	Mean ± SEM of WT	4#	5#	6#	Mean ± SEM of DKO	p Value
Meat color score	3.5	4	4	3.833 ± 0.1667 N=3	4.5	4.5	5	4.667 ± 0.1667 N=3	0.0241
