# Supplementary material for: CD163 and pAPN double-knockout pigs are resistant to PRRSV and TGEV and exhibit decreased susceptibility to PDCoV while maintaining normal production performance
Source: eLife. 2020 Sep 2;9:e57132. doi: 10.7554/eLife.57132 (PMC7467724; doi:10.7554/eLife.57132)
Supplement: Figure 5—source data 2. [file elife-57132-fig5-data2.xlsx]

## Sheet: Sheet1
Figure 5-source data 2. Detection of Fe content in longissimus dorsi muscle from WT pigs and DKO pigs
	WT pigs										DKO pigs
Item	A1#			A2#			A3#			Mean ± SEM of WT	4#			5#			6#			Mean ± SEM of DKO	p Value
	repeat 1	repeat 2	repeat 3	repeat 1	repeat 2	repeat 3	repeat 1	repeat 2	repeat 3		repeat 1	repeat 2	repeat 3	repeat 1	repeat 2	repeat 3	repeat 1	repeat 2	repeat 3
Fe (mg/kg)	3.6775	3.8449	4.0516	2.9312	3.2985	3.259	5.0654	4.456	5.0013	3.953 ± 0.4872 N = 3	5.3542	6.1104	5.6689	5.6682	5.4349	5.9195	7.2673	7.3193	6.7011	6.160 ± 0.4701 N = 3	0.0311
