# Supplementary material for: CD163 and pAPN double-knockout pigs are resistant to PRRSV and TGEV and exhibit decreased susceptibility to PDCoV while maintaining normal production performance
Source: eLife. 2020 Sep 2;9:e57132. doi: 10.7554/eLife.57132 (PMC7467724; doi:10.7554/eLife.57132)
Supplement: Figure 5—source data 3. [file elife-57132-fig5-data3.xlsx]

## Sheet: Sheet1
Figure 5-source data 3. Serum Hp levels of WT and DKO pigs
Genotype	Pig No.	repeat 1	repeat 2	repeat 3	repeat 4	Mean ± SEM	p Value
WT	2#	1.648	1.571	1.598		0.9544 ± 0.1232 N=22	< 0.0001
	3#	1.429	1.404	1.403
	4#	1.486	1.467	1.447
	6#	0.975	0.977	0.966
	7#	0.854	0.834	0.828
	9#	1.006	0.967	0.971
	10#	0.411	0.405	0.42
	11#	2.043	2.005	2.004
	12#	0.434	0.435	0.412
	13#	0.42	0.417	0.389
	14#	0.376	0.372	0.363
	15#	1.133	1.139	1.105
	17#	0.505588	0.507795	0.514419	0.480198
	18#	0.325	0.324	0.331
	19#	0.545	0.536	0.545
	20#	0.64	0.617	0.618
	21#	1.36994	1.39865	1.4141	1.40968
	22#	0.444	0.447	0.449
	24#	1.09176	1.09397	1.51566	1.08514
	25#	2.62619	1.91086	2.56105	2.64274
	26#	0.57	0.572	0.545
	30#	0.949	0.923	0.911
DKO	473#	1.80267	1.753	1.7254	1.75852	2.536 ± 0.1977 N=6
	478#	2.98606	2.9419	3.03353	2.96288
	481#	2.70346	2.59969	2.64164	2.73437
	482#	2.09521	2.08417	2.22326	2.18462
	484#	2.81826	2.87567	2.97943	3.12405
	486#	2.53015	2.83593	2.83593	2.69242
