# Supplementary material for: CD163 and pAPN double-knockout pigs are resistant to PRRSV and TGEV and exhibit decreased susceptibility to PDCoV while maintaining normal production performance
Source: eLife. 2020 Sep 2;9:e57132. doi: 10.7554/eLife.57132 (PMC7467724; doi:10.7554/eLife.57132)
Supplement: Source data 1. [file elife-57132-data1.xlsx]

## Sheet: Sheet1
Supplementary file 4-source data. Amino acid content of DKO lean meat and WT lean meat
	WT pigs							DKO pigs
Item	A1#		A2#		A3#		Mean ± SEM of WT	4#		5#		6#		Mean ± SEM of DKO	p Value
	repeat 1	repeat 2	repeat 1	repeat 2	repeat 1	repeat 2		repeat 1	repeat 2	repeat 1	repeat 2	repeat 1	repeat 2
Asp (%)	2.3583	2.4021	2.1041	2.2377	2.086	2.1637	2.223 ± 0.07965 N = 3	2.2189	2.2532	2.1251	2.1106	2.1425	2.2049	2.177 ± 0.03480 N = 3	0.6198
Thr (%)	1.1126	1.1282	0.9917	1.0613	0.9891	1.0348	1.053 ± 0.03383 N = 3	1.057	1.0722	0.9997	0.9978	1.0301	1.0502	1.033 ± 0.01764 N = 3	0.6278
Ser (%)	0.9175	0.9109	0.8223	0.8837	0.8517	0.861	0.8733 ± 0.01856 N = 3	0.8775	0.9042	0.8346	0.8401	0.8737	0.8865	0.8700 ± 0.01528 N = 3	0.8964
Glu (%)	3.9588	4.0592	3.465	3.7327	3.5158	3.6823	3.737 ± 0.1367 N = 3	3.7362	3.8182	3.4807	3.4841	3.597	3.6489	3.627 ± 0.08667 N = 3	0.534
Gly (%)	0.9931	1.0041	0.9279	0.9546	1.1431	0.9422	0.9933 ± 0.02906 N = 3	0.9594	1.0023	0.974	0.962	0.985	1.063	0.9900 ± 0.01528 N = 3	0.924
Ala (%)	1.398	1.4219	1.2627	1.3329	1.332	1.322	1.347 ± 0.03283 N = 3	1.3514	1.3744	1.2935	1.2884	1.3741	1.4215	1.350 ± 0.03215 N = 3	0.9456
Cys (%)	0.199441	0.244879	0.189267	0.223769	0.17839	0.194038	0.2033 ± 0.006667 N = 3	0.202981	0.202475	0.212337	0.181785	0.209951	0.213316	0.2033 ± 0.003333 N = 3	> 0.9999
Val (%)	1.221	1.2971	1.1564	1.2314	1.1542	1.1426	1.200 ± 0.03215 N = 3	1.2176	1.2422	1.1334	1.1722	1.1717	1.2291	1.193 ± 0.02333 N = 3	0.8749
Met (%)	0.694	0.7185	0.6071	0.6582	0.6063	0.6443	0.6567 ± 0.02667 N = 3	0.6584	0.6598	0.6202	0.6056	0.6151	0.618	0.6300 ± 0.01528 N = 3	0.4345
Ile (%)	1.1092	1.1382	0.9946	1.0517	0.9868	1.0429	1.050 ± 0.03512 N = 3	1.0699	1.0785	1.0147	1.0214	1.0016	1.034	1.037 ± 0.01667 N = 3	0.7489
Leu (%)	2.1242	2.1693	1.8872	2.0047	1.8984	1.9871	2.013 ± 0.06839 N = 3	2.0256	2.0492	1.921	1.9257	2.001	2.07	2.000 ± 0.04000 N = 3	0.8745
Tyr (%)	0.7791	0.79	0.6904	0.7266	0.6849	0.7152	0.7300 ± 0.02517 N = 3	0.7373	0.7466	0.6995	0.702	0.7298	0.7369	0.7233 ± 0.01202 N = 3	0.8228
Phe (%)	0.9314	0.9477	0.8356	0.8891	0.8245	0.8586	0.8800 ± 0.03055 N = 3	0.8846	0.8993	0.8436	0.842	0.7972	0.8169	0.8467 ± 0.02333 N = 3	0.4348
Lys (%)	2.2264	2.2791	1.9803	2.1188	1.9679	2.0629	2.107 ± 0.07219 N = 3	2.0968	2.1347	1.9924	1.9902	1.9956	2.0534	2.043 ± 0.03930 N = 3	0.484
His (%)	1.0045	1.0334	0.9599	1.0004	0.9511	0.9754	0.9867 ± 0.01764 N = 3	1.0016	0.9995	0.9962	0.9877	0.9941	1.0397	1.003 ± 0.008819 N = 3	0.4456
Arg (%)	1.5533	1.6248	1.3795	1.4842	1.4333	1.4733	1.490 ± 0.05033 N = 3	1.4828	1.5228	1.4133	1.4017	1.3869	1.4336	1.440 ± 0.03000 N = 3	0.4416
Pro (%)	0.8484	0.8479	0.7304	0.8192	0.8462	0.8004	0.8133 ± 0.02333 N = 3	0.8012	0.8449	0.807	0.7758	0.7373	0.8264	0.7967 ± 0.01202 N = 3	0.5599
Trp (%)	0.21762	0.197239	0.238884	0.215218	0.209595	0.187712	0.2133 ± 0.008819 N = 3	0.23018	0.20959	0.202328	0.223362	0.202966	0.182172	0.2067 ± 0.008819 N = 3	0.6213
