# Supplementary material for: CD163 and pAPN double-knockout pigs are resistant to PRRSV and TGEV and exhibit decreased susceptibility to PDCoV while maintaining normal production performance
Source: eLife. 2020 Sep 2;9:e57132. doi: 10.7554/eLife.57132 (PMC7467724; doi:10.7554/eLife.57132)
Supplement: Source data 2. [file elife-57132-data2.xlsx]

## Sheet: Sheet1
Supplementary file 8-source data. Birth weights and average daily gains of WT pigs and DKO pigs from birth weight to slaughtering weight
	WT pigs				DKO pigs
Item	A1#	A2#	A3#	Mean ± SEM of WT	4#	5#	6#	Mean ± SEM of DKO	p Value
Birth weight (kg)	1.31	1.24	1.27	1.273 ± 0.02028 N=3	1.15	1.36	1.29	1.267 ± 0.06173 N=3	0.9232
Average daily gain (g)	525.12	449.58	473.73	482.8 ± 22.27 N=3	477.12	488.61	510.03	491.9 ± 9.643 N=3	0.7265
