# Supplementary material for: CD163 and pAPN double-knockout pigs are resistant to PRRSV and TGEV and exhibit decreased susceptibility to PDCoV while maintaining normal production performance
Source: eLife. 2020 Sep 2;9:e57132. doi: 10.7554/eLife.57132 (PMC7467724; doi:10.7554/eLife.57132)
Supplement: Table 1—source data 1. [file elife-57132-table1-data1.xlsx]

## Sheet: Sheet1
Table 1-source data. Carcass traits and meat quality characteristics of DKO and WT Large White pigs
	WT pigs				DKO pigs
Item	A1#	A2#	A3#	Mean ± SEM of WT	4#	5#	6#	Mean ± SEM of DKO	p Value
Live weight at slaughter (kg)	174.6	149.6	157.6	160.6 ± 7.371 N=3	158.6	162.6	169.6	163.6 ± 3.215 N=3	0.728
Carcass weight (kg)	136	113.5	117.5	122.3 ± 6.930 N=3	124	126	131.5	127.2 ± 2.242 N=3	0.5433
Carcass length (cm)	120.8	115.8	119.1	118.6 ± 1.468 N=3	119.1	116	117.8	117.6 ± 0.8988 N=3	0.6164
Dressing percentage (%)	77.89	75.87	74.56	76.11 ± 0.9685 N=3	78.18	77.49	77.54	77.74 ± 0.2221 N=3	0.1763
Ham percentage (%)	30.58	32.93	31.46	31.66 ± 0.6855 N=3	31.91	32.57	30.73	31.74 ± 0.5382 N=3	0.9313
Lean rate (%)	71.84	69.12	68.86	69.94 ± 0.9530 N=3	68.51	65.05	66.67	66.74 ± 0.9995 N=3	0.0816
Loin eye area (cm2)	60.7	56.73	49.93	55.79 ± 3.145 N=3	68.61	59.5	57.06	61.72 ± 3.515 N=3	0.2766
Average backfat thickness (mm)	15.2	15.94	14.51	15.22 ± 0.4129 N=3	16.84	22	15.08	17.97 ± 2.076 N=3	0.2628
Muscle pH 1	5.96	6.2	6.14	6.100 ± 0.07211 N=3	5.9	6.48	6.17	6.183 ± 0.1676 N=3	0.6715
Muscle pH 24	5.64	5.68	5.7	5.673 ± 0.01764 N=3	5.65	5.68	5.68	5.670 ± 0.01000 N=3	0.8774
Meat color score	3.5	4	4	3.833 ± 0.1667 N=3	4.5	4.5	5	4.667 ± 0.1667 N=3	0.0241
Marbling	1	1.5	1	1.167 ± 0.1667 N=3	1	1.5	1	1.167 ± 0.1667 N=3	> 0.9999
Drip loss (%)	4.19	3.36	3.09	3.547 ± 0.3310 N=3	3.45	2.92	3.4	3.257 ± 0.1690 N=3	0.4788
