# Supplementary material for: CD163 and pAPN double-knockout pigs are resistant to PRRSV and TGEV and exhibit decreased susceptibility to PDCoV while maintaining normal production performance
Source: eLife. 2020 Sep 2;9:e57132. doi: 10.7554/eLife.57132 (PMC7467724; doi:10.7554/eLife.57132)
Supplement: Table 2—source data 1. [file elife-57132-table2-data1.xlsx]

## Sheet: Sheet1
Table 2-source data. Total protein, total fat, ash, moisture, and individual mineral content of DKO lean meat and WT lean meat
	WT pigs										DKO pigs
Item	A1#			A2#			A3#			Mean ± SEM of WT	4#			5#			6#			Mean ± SEM of DKO	p Value
	repeat 1	repeat 2	repeat 3	repeat 1	repeat 2	repeat 3	repeat 1	repeat 2	repeat 3		repeat 1	repeat 2	repeat 3	repeat 1	repeat 2	repeat 3	repeat 1	repeat 2	repeat 3
Total protein (%)	23.1972	24.6133		23.0921	23.0835		23.3738	22.9871		23.40 ± 0.2517 N = 3	23.7718	23.825		22.6516	22.3727		22.9661	22.7163		23.03 ± 0.3930 N = 3	0.476
Total fat (%)	1.03412	1.06327		0.855329	0.915162		1.38817	1.32588		1.100 ± 0.1528 N = 3	1.32801	1.27801		2.16921	2.36618		2.40223	2.63308		2.033 ± 0.3712 N = 3	0.0807
Ash (%)	1.0875	1.0921		1.0566	1.0495		1.0589	1.0807		1.100 ± 0 N = 3	1.0611	1.0773		1.0928	1.09		1.0926	1.0927		1.100 ± 0 N = 3
Moisture (%)	72.6	72.6		74.4	75.1		73.9	73.7		73.73 ± 0.6360 N = 3	73.6	74.1		73.4	70.2		72.9	73.2		72.90 ± 0.6083 N = 3	0.3973
P (mg/100 g)	0.223	0.226		0.219	0.218		0.219	0.217		220.0 ± 2.000 N = 3	0.216	0.216		0.217	0.216		0.225	0.227		219.3 ± 3.333 N = 3	0.8722
Ca (mg/kg)	38.5748	42.5482		35.4636	32.7094		35.7245	32.7835		36.33 ± 2.134 N = 3	35.5031	32.1711		38.3663	41.1393		53.2744	58.5908		43.17 ± 6.598 N = 3	0.3802
Cu (mg/kg)	0.179751	0.193654		0.128586	0.088727		0.189226	0.187866		< 0.5000	0.224199	0.180769		0.219855	0.213081		0.270829	0.301016		< 0.5000
Fe (mg/kg)	3.6775	3.8449	4.0516	2.9312	3.2985	3.259	5.0654	4.456	5.0013	3.953 ± 0.4872 N = 3	5.3542	6.1104	5.6689	5.6682	5.4349	5.9195	7.2673	7.3193	6.7011	6.160 ± 0.4701 N = 3	0.0311
K (g/kg)	3.39	3.72		3.68	3.56		2.82	2.58		3.293 ± 0.2972 N = 3	2.92	2.74		2.72	2.52		3.08	3.4		2.897 ± 0.1821 N = 3	0.3186
Mg (mg/kg)	255.54	267.415		260.708	259.401		264.014	256.499		260.3 ± 0.3333 N = 3	270.651	256.333		259.801	259.298		265.32	262.977		262.3 ± 1.202 N = 3	0.1841
Mn (mg/kg)	0.044021	0.019174		0.020119	0.019613		0.023014	0.012927		< 0.3000	0.058366	0.031232		0.043971	0.079144		0.046079	0.06647		< 0.3000
Na (mg/kg)	347.623	381.122		356.148	327.961		360.167	348.628		353.3 ± 6.360 N = 3	342.364	312.463		369.819	369.41		366.511	374.559		356.0 ± 14.50 N = 3	0.8744
Se (mg/kg)	0.088	0.10		0.11	0.11		0.10	0.10		0.1013 ± 0.004667 N = 3	0.091	0.10		0.080	0.085		0.071	0.063		0.08200 ± 0.008660 N = 3	0.1208
