# Supplementary material for: CD163 and pAPN double-knockout pigs are resistant to PRRSV and TGEV and exhibit decreased susceptibility to PDCoV while maintaining normal production performance
Source: eLife. 2020 Sep 2;9:e57132. doi: 10.7554/eLife.57132 (PMC7467724; doi:10.7554/eLife.57132)
Supplement: Table 3—source data 1. [file elife-57132-table3-data1.xlsx]

## Sheet: Sheet1
Table 3-source data. Comparison of the concentration, motility, and velocity distribution of the sperm between DKO and WT Large White pigs
	WT pigs					DKO pigs
Item	A1#	A3#	B1#	B2#	Mean ± SEM of WT	4#	5#	6#	Mean ± SEM of DKO	p Value
Concentration (106/mL)	1073.4	714.2	1212	1358	1089 ± 137.9 N=4	1536	1248.4	743.8	1176 ± 231.5 N=3	0.7461
Motility (%)	91	93	84	84	88.00 ± 2.345 N = 4	87	91	80	86.00 ± 3.215 N = 3	0.6268
Rapid (%)	7	1	0	0	2.000 ± 1.683 N = 4	3.5	3	1	2.500 ± 0.7638 N=3	0.8206
Medium (%)	38	32	33	30	33.25 ± 1.702 N = 4	45.5	49	12	35.50 ± 11.79 N=3	0.832
Slow (%)	45	59	51	54	52.25 ± 2.926 N = 4	38	39	67	48.00 ± 9.504 N=3	0.6449
Static (%)	9	7	16	16	12.00 ± 2.345 N = 4	13	9	20	14.00 ± 3.215 N=3	0.6268
